1 **TITLE PAGE**

2

3 **Type of manuscript: Research article**

4

5 **Full-length title: Dramatic HIV DNA degradation associated with spontaneous HIV**  
6 **suppression and disease-free outcome in a young seropositive woman following her**  
7 **infection**

8 **Short title (for the running head): Dramatic HIV DNA degradation postinfection**

9

10 **Author list: Philippe COLSON<sup>1,2§</sup>, Catherine DHIVER<sup>1§</sup>, Catherine TAMALET<sup>1</sup>,**  
11 **Jeremy DELERCE<sup>1</sup>, Olga O. GLAZUNOVA<sup>1</sup>, Maxime GAUDIN<sup>2</sup>, Anthony**  
12 **LEVASSEUR<sup>1,2</sup>, Didier RAOULT<sup>1,2\*</sup>**

13 **Affiliations:** <sup>1</sup> IHU Méditerranée Infection, 19-21 boulevard Jean Moulin, 13005 Marseille,  
14 France; <sup>2</sup> Aix-Marseille Univ., IRD, AP-HM, MEPHI, 27 boulevard Jean Moulin, 13005  
15 Marseille, France.

16 <sup>§</sup> Contributed equally to the work.

17 <sup>\*</sup> Correspondence to: Pr Didier Raoult, IHU - Méditerranée Infection, 19-21 boulevard Jean  
18 Moulin, 13005 Marseille, France; tel.: +33 413 732 401; fax: +33 413 732 402; email:  
19 [didier.raoult@gmail.com](mailto:didier.raoult@gmail.com)

20

21 **Word counts:** summary: 200; text, 2,754

22 **Keywords:** HIV infection; spontaneous viral suppression; APOBEC3; genome degradation;  
23 G-to-A mutations; stop codons

24

25

## ABSTRACT

26

27 Strategies to cure HIV-infected patients by virus-targeting drugs have failed to date. We  
28 identified a HIV-1-seropositive woman who spontaneously suppressed HIV replication and  
29 had normal CD4-cell counts, no HIV disease, no replication-competent virus and no cell HIV  
30 DNA detected with a routine assay. We suspected that dramatic HIV DNA degradation  
31 occurred postinfection. We performed multiple nested-PCRs followed by Sanger sequencing  
32 and applied a multiplex-PCR approach. Furthermore, we implemented a new technique based  
33 on two hybridization steps on beads prior to next-generation sequencing that removed human  
34 DNA then retrieved integrated HIV sequences with HIV-specific probes. We assembled  
35 ≈45% of the HIV genome and further analyzed the G-to-A mutations putatively generated by  
36 cellular APOBEC3 enzymes that can change tryptophan codons into stop codons. We found  
37 more G-to-A mutations in the HIV DNA from the woman than in that of her contaminator.  
38 Moreover, 74% of the tryptophan codons were changed to stop codons (25%) or were deleted  
39 as a possible consequence of gene inactivation. Finally, we found that this woman's cells  
40 remained HIV-susceptible *in vitro*. Our findings show that she does not exhibit innate HIV  
41 resistance but has been cured of it by extrinsic factors, a plausible candidate for which is the  
42 gut microbiota.

43

44

45

## TEXT

46

## 47 INTRODUCTION

48 The evolution of vertebrates has included the integration in their genomes of multiple  
49 retrovirus sequences<sup>1</sup>. Humans are not the exception to the rule as ≈8% of their genome  
50 consist in retroviral DNA. Most integrated retrovirus sequences were inactivated by  
51 substantial degradation, and only remain as relics of ancient retrovirus epidemics<sup>2,3</sup>. This  
52 general biological phenomenon that consists in the cannibalism of the DNA from viral  
53 invaders has been revealed to be on-going in koalas with retroviruses causing an AIDS-like  
54 syndrome<sup>4</sup>. Regarding HIV, the problem of prevention and cure of HIV infection has not been  
55 solved since its discovery<sup>5,6</sup>. Only two cases of HIV-1 remission have been described  
56 following CCR5delta32/delta32 hematopoietic stem-cell transplantation<sup>7,8</sup>. However, some  
57 paths could open new therapeutic and preventive avenues. An alternative option to cure  
58 patients of HIV might be to strengthen, if identified, natural antiviral defenses. A group of  
59 cellular enzymes named APOBEC3 exists whose function is to destroy invading viruses,  
60 including retroviruses<sup>9</sup>. The predominant role of APOBEC3s is to deaminate Cs that are  
61 changed to Ts, which leads to G-to-A mutations in integrated viral DNA. The genomes of  
62 HIV and SIV in great apes encode a protein, Vif, that inhibits their action<sup>10</sup>. However, it has  
63 been evidenced in gorillas that a single mutation in the APOBEC3G gene can confer  
64 resistance to SIV from chimpanzees by counteracting Vif activity<sup>10</sup>. In addition, it was  
65 recently shown that a patient experienced a dramatic decrease in peripheral blood  
66 mononuclear cell (PBMC) HIV-1 DNA load in response to a release of immunity by  
67 monoclonal antibodies targeting PD-1<sup>11</sup>, whose activity is known to be modulated by the gut  
68 microbiota<sup>12,13</sup>. Moreover, the regulation of immune responses by exogenous factors  
69 including the microbiota is an emerging field in cancer immunotherapy<sup>12,13</sup>. Thus, the

70 immune control of HIV infection under the influence of exogenous factors is not a theoretical  
71 impossibility.

72 We previously described two HIV-1-seropositive patients who we believe might have  
73 spontaneously cured of HIV<sup>14, 15</sup>. Indeed, although they never received antiretrovirals, they  
74 persistently have a suppressed HIV replication, normal CD4 T cell counts, and no HIV-related  
75 disease for more than 10 years (one was HIV-diagnosed in 1985). In addition, no replication-  
76 competent HIV was retrieved by culture, and HIV DNA was not detected in peripheral blood  
77 mononuclear cells (PBMC) by our diagnosis assay. PBMC HIV DNA was only laboriously  
78 obtained by performing hundreds PCR. While searching for other index cases to understand if  
79 it is possible to be cured spontaneously of HIV, we investigated a third case.

80

## 81 **METHODS**

### 82 **Sample collection**

83 Samples were obtained from the patient in January 2015, September 2015 and January 2017  
84 in an attempt to obtain the greatest number of HIV sequences from peripheral blood  
85 mononuclear cells (PBMCs). Samples were obtained from the contaminator in January 2017.  
86 Informed written consent was obtained from the patients. This study was approved by our  
87 institution's ethics committee (ethics committee of IHU Méditerranée Infection) (N°2018-  
88 001).

### 89 **PCR amplification, Sanger sequencing and multiplex PCR technique**

90 HIV-1 DNA Sanger population sequencing was performed as described previously<sup>14</sup>. All HIV  
91 genes were targeted by at least one PCR system (supplementary information), and all PCRs  
92 were conducted in quadruplicate. PCR positivity was determined based on obtaining an HIV  
93 sequence by Sanger sequencing. A multiplex PCR technique called "Bortsch" was also  
94 performed as described previously<sup>14</sup>.

95 **Human DNA depletion, HIV-1 DNA enrichment procedures and Illumina next-**  
96 **generation sequencing of DNA extracted from the woman PBMCs**

97 *Human and HIV-1-specific probe design*

98 Whole human-specific probes (baits) were constructed as described in a previously developed  
99 protocol<sup>16</sup> with modifications<sup>17</sup>. A full-length human genome derived from a modern  
100 reference individual (HapMap individual NA21732; Coriell Institute for Medical Research,  
101 Camden, NJ) was used as a template to generate biotinylated RNA “bait” libraries spanning  
102 the entire human genome. For the design of HIV-1-specific probes, full-length HIV-1  
103 genomes or HIV-1 DNA fragments were fenestrated using a Perl script into a 120 nucleotide-  
104 long fragment with a sliding window of 60 nucleotides. The targeted HIV-1 sequences were  
105 genomes from the set of HIV-1 reference genomes of the Los Alamos National Institutes of  
106 Health HIV sequence database  
107 (<https://www.hiv.lanl.gov/content/sequence/NEWALIGN/align.html#comp>), HIV genomes  
108 obtained from two patients whose cases were previously described<sup>14</sup>, and HIV-1 DNA that  
109 had been recovered from the woman and her contaminator. The set of 20,000 probes was  
110 synthesized by Arbor Biosciences (Arbor Biosciences, Ann Arbor, MI, USA).

111 *Library preparation for the next-generation sequencing*

112 DNA extraction was performed on 200  $\mu$ L of PBMCs ( $\approx 2e5$  cells) collected from the woman,  
113 using the EZ1 Virus Mini Kit v2.0 (Qiagen Hilden, Germany) according to the manufacturer’s  
114 protocols. Five paired-end libraries were prepared using 1 ng of extracted DNA and MiSeq  
115 Technology with the paired-end method and the Nextera XT kit (Illumina Inc., San Diego,  
116 CA, USA). DNA was fragmented, and adaptors containing the Illumina P5/P7 primer  
117 sequences and tags were added.

118 *Human DNA depletion procedure*

119 Five depletions of human nucleic acids were performed separately by hybridization of 50  $\mu$ L

120 of each prepared Illumina library ( $\approx 100$  ng of DNA) with 500 ng of biotinylated human RNA-  
121 bait library. Targeted fragment/probe heteroduplexes were captured using magnetic  
122 streptavidin-harboring beads (MyOne Streptavidin C1 Dynabeads (Life Technologies,  
123 Carlsbad, USA)), as previously described<sup>17</sup>. The unbound fraction (supernatant) was  
124 concentrated and cleaned using 1.8 $\times$  AMPure XP beads (Beckman Coulter, Fullerton, CA,  
125 USA) according to the manufacturer's protocol with elution into 30  $\mu$ l of 1X TE buffer. The  
126 five purified fractions were then pooled and concentrated using a MinElute PCR Purification  
127 Kit (Qiagen) according to the manufacturer's protocol with elution in 10  $\mu$ l of elution buffer.  
128 To generate sufficient material for targeted enrichment, this product was amplified using eight  
129 PCR amplification cycles with Illumina P5/P7 primers, before purification using a MinElute  
130 PCR Purification Kit (Qiagen) and elution with 10  $\mu$ l of elution buffer.

### 131 ***Targeted HIV enrichment through hybridization capture***

132 A total of 500 ng of the human-depleted library was used to perform the targeted HIV  
133 enrichment step involving hybridization with the HIV-specific probes using a myBaits target  
134 capture kit (Arbor Biosciences) according to the manufacturer's instructions (Hybridization  
135 Capture for Targeted NGS manual version 4.01). Hybridization-based capture reactions with  
136 undiluted HIV-1 probes (500 ng) was performed at 65°C for 16 h. Streptavidin-coated  
137 magnetic beads (myBaits kit) were added to the hybridization mixture, and the sample was  
138 additionally incubated for 5 min at 65°C. After washing steps, beads were resuspended in 30  
139  $\mu$ L of 10 mM Tris-Cl, 0.05% Tween-20 solution (pH 8.0-8.5). The captured DNA was  
140 dissociated from beads by heating the suspension at 95°C for 5 min. HIV-1 DNA and human  
141 albumin DNA were quantified by a multiplex real-time PCR assay as previously described<sup>14</sup>.

### 142 ***Next-generation sequencing and sequence read analysis***

143 The product of the HIV enrichment procedure was normalized according to the Nextera XT  
144 protocol for pooling and sequencing on a MiSeq instrument (Illumina). A single run of 39 h in

145 2×250 base pairs (bp) was carried out for paired-end sequencing and cluster generation. Reads  
146 were filtered based on their quality, generated paired reads were imported into the CLC  
147 software (<https://www.qiagenbioinformatics.com/products/clc-genomics-workbench/>) and  
148 then assembled by mapping to the HIV genome GenBank accession no. K03455.1 (HIV-1  
149 strain HXB2) and to sequences obtained from the woman and contaminator PBMCs. Reads  
150 identified as corresponding to HIV sequences were exported as fasta and SAM files.

151 **Comparisons of HIV-1 sequences obtained from the woman PBMCs and her**  
152 **contaminator PBMCs and analysis of G-to-A mutations and of substitution of**  
153 **tryptophan codons by stop codons**

154 A custom script written in Python language was used to analyze the SAM file generated from  
155 the mapping of reads obtained by next-generation sequencing and to count differences in  
156 amino acids between HIV sequences recovered from the PBMCs of the woman and her  
157 contaminator. In addition, alignments of nucleotide sequences obtained by Sanger and next-  
158 generation sequencing were performed using the MUSCLE program<sup>18</sup>. The phylogenetic  
159 analysis was performed using the MEGA6 software ([www.megasoftware.net](http://www.megasoftware.net)) with the  
160 neighbor-joining method. Nucleotide sequences were merged into a Microsoft Excel file  
161 using sequences from the HIV-1 K03455.1 genome (HXB2 strain) or those obtained from the  
162 contaminator PBMCs as references. An alignment was also performed using the same  
163 sequences after their translation into amino acids from the three open reading frames using the  
164 Transeq online tool ([https://www.ebi.ac.uk/Tools/st/emboss\\_transeq/](https://www.ebi.ac.uk/Tools/st/emboss_transeq/)) and amino acid  
165 sequences from the proteins of the HXB2 strain as references, and these aligned sequences  
166 were merged into the Microsoft Excel file. G-to-A mutations and substitution of tryptophan  
167 codons by stop codons were searched using the Microsoft Excel software.

168 **HIV culture assay**

169 Testing for PBMC resistance to HIV was conducted as previously described<sup>14, 19</sup>.

170 **Supplementary material**

171 HIV sequences obtained in the present study are available at [https://www.mediterranee-](https://www.mediterranee-infection.com/acces-ressources/donnees-pour-articles/hiv/)  
172 [infection.com/acces-ressources/donnees-pour-articles/hiv/](https://www.mediterranee-infection.com/acces-ressources/donnees-pour-articles/hiv/) or have been submitted to  
173 GenBank (submission ID: 2225641).

174

175 **RESULTS**

176 The patient is a 37-year-old woman sexually infected with HIV-1 between 2002 and 2004 by  
177 a single partner and diagnosed as seropositive in July 2006 (see Supplementary Fig. S1  
178 online). She never received antiretrovirals except in 2012 during the third trimester of her  
179 pregnancy (zidovudine, 300 mg/d). Nevertheless, to date, she has persistently had normal  
180 CD4 T lymphocyte counts (mean value between 2006 and 2018,  $1,221 \pm 172/\text{mm}^3$ ) and  
181 remained free of HIV-related disease. In addition, HIV RNA was not detected in plasma using  
182 commercialized PCR assays on ten occasions during follow-up, and no replication-competent  
183 HIV was retrieved by coculture. Moreover, no PBMC HIV DNA was detected by routine  
184 diagnostic tests<sup>14</sup> on six occasions between 2010 and 2018. However, the woman's PBMCs  
185 were found to be susceptible to the HIV-1 NL4-3 strain. This finding indicates that this  
186 woman acquired the capability to combat HIV after her infection and suggests the role of an  
187 extrinsic factor. Moreover, she was not infected with a defective HIV strain, as in her  
188 contaminator, a 30-year-old man HIV-diagnosed in 1990, the HIV DNA load was 350  
189 copies/million PBMCs, and the CD4 T cell count fell to  $<200/\text{mm}^3$ , which required  
190 antiretroviral therapy.

191         Based on these findings and our previous work<sup>14</sup>, we suspected that the HIV genome  
192 in this young woman had been drastically degraded after its integration. We attempted to  
193 obtain fragments of HIV DNA from her PBMCs and assess their degradation by using  
194 thorough molecular procedures and the contaminator's HIV sequences as a reference. We



195 used different strategies to retrieve the maximum number of HIV sequences from the PBMCs  
196 of this woman in whom standard assays had failed to detect HIV DNA. First, we performed  
197 nested PCR targeting HIV sequences from the literature, including with a multiplex PCR  
198 technique<sup>14</sup>. During these steps, HIV sequences were obtained by Sanger sequencing from 26  
199 (7%) of 392 nested PCRs performed on the woman PBMCs (Table 1). The mean PCR product  
200 size was 251±201 nucleotides, 54% being shorter than 200 nucleotides, and they assembled  
201 into 3,254 nucleotide-long noncontiguous fragments classified as HIV-1 subtype B (Fig. 1).  
202 HIV sequences obtained from the woman matched those of the near full-length HIV genome  
203 (9,337 nucleotides) recovered from the PBMCs of her partner, confirming that this patient  
204 was the contaminator and that the young woman was infected with a nondefective viral strain  
205 and eliminating a contamination. Second, for the first time, we implemented a technique using  
206 two successive steps of uptake on probe-coated beads. The two steps consisted of human  
207 DNA depletion with human DNA-targeting probes followed by HIV DNA enrichment with a  
208 set of HIV probes complementary to the contaminator HIV sequences. This enriched HIV  
209 DNA was thereafter nonspecifically amplified and sequenced by Illumina next-generation  
210 sequencing. We obtained 73 reads through this procedure that increased the length of the  
211 assembled HIV genome by 17% (1,133 nucleotides) (Fig. 2a; see Supplementary Information  
212 online). Overall, by these three approaches and carrying out hundreds of manipulations, we  
213 obtained a set of noncontiguous fragments covering 4,387 nucleotides of the integrated HIV  
214 DNA of this young woman.

215 Then, as the genome of the HIV strain that infected this young woman had been  
216 obtained from her contaminator, we were able to determine the number of G-to-A mutations  
217 attributed to APOBEC3G activity in her HIV DNA, and specifically the number of tryptophan  
218 codons eliminated either by their change to stop codons or because fragments of DNA  
219 containing the tryptophan codons were lost. G-to-A mutations were observed in the woman's

220 HIV DNA at 152 (16%) positions of the HIV DNA from the contaminator that only harbored  
221 G, and a G-to-A excess was detected in the woman compared to her contaminator, notably for  
222 the genes encoding HIV reverse transcriptase; integrase; Vif, which counteracts APOBEC3G;  
223 Vpr; Vpu; and Env gp120 (Table 2; see see Supplementary Table S1 online). We thereafter  
224 determined that HIV sequences of the woman only covered 47 (52%) of the 91 tryptophan  
225 codons of the HIV genome; however, they were all present in sequences retrieved from the  
226 contaminator (Table 3; Fig. 2b). In the woman's HIV DNA, changes from a tryptophan codon  
227 to a stop codon were observed 5 times in *vif* and *gp120* envelope genes, 4 times in integrase  
228 gene, and twice in *gag*, reverse transcriptase, *vpr* and *vpu* genes, contrasting with no such  
229 changes in HIV DNA from the contaminator. With regard to HIV sequences generated by  
230 next-generation sequencing of DNA from the woman PBMCs, 67 (74%) of the 91 tryptophan  
231 codons present in the contaminator HIV DNA were either retrieved but changed to stop  
232 codons (as observed for 17 (63%) of 27 tryptophan codons on average (Table 4)) or located in  
233 HIV-1 DNA regions that we did not retrieve as a possible consequence of their degradation or  
234 loss. Thus, G-to-A mutations, the absence of codon coverage, or both states combined were  
235 significantly more frequent at tryptophan codons than at any other codon. Overall, we found  
236 that G-to-A mutations generating stop codons occurred in at least one sequence at 23 (49%) of  
237 the 47 covered tryptophan codons (at 9 and 16 of those covered by Sanger and next-  
238 generation sequencing, respectively) in viral sequences recovered from the woman, whereas  
239 no such change was detected in HIV sequences obtained from the contaminator at any of the  
240 91 covered tryptophan codons. Taken together, these findings suggest that APOBEC3G  
241 activity was greater in the woman than in her contaminator and this increased activity induced  
242 a dramatic degradation of integrated PBMC HIV DNA after infection. The detection of  
243 several stop codons in the Vif-encoding gene is particularly worthy of note because this  
244 protein counteracts APOBEC3G by triggering its degradation<sup>20</sup>. In addition, APOBEC3G

245 DNA sequencing in the patient did not show mutations compared to reference sequences at  
246 Vif-APOBEC3 interaction sites, oligomerization/encapsidation sites, and N- and C-terminal  
247 active sites (see see Supplementary Fig. S2 online).

248

## 249 **DISCUSSION**

250 We present here evidence that a young woman was infected with HIV, as she is seropositive  
251 and HIV sequences were eventually retrieved from her PBMCs using ultrasensitive methods,  
252 but after infection spontaneously and thoroughly degraded the HIV genomes integrated in her  
253 DNA. This occurred through G-to-A mutations, which is the signature of APOBEC3 cellular  
254 enzymes, and led to gene inactivation by changing tryptophan codons into stop codons.  
255 Clinically, the woman never developed immunodeficiency or HIV-related symptoms, which  
256 suggests that she was cured of HIV<sup>15</sup>. The fate of HIV infection was totally different in her  
257 contaminator although both individuals where infected with a same HIV strain. These  
258 findings highlight that the different outcome relied on host response to infection, not on the  
259 viral strain. The woman harbored far less abundant and more degraded HIV DNA than her  
260 contaminator, revealing a more extensive action of APOBEC3 enzymes. In humans, greater  
261 APOBEC3G amounts in blood resting memory CD4 cells was associated with lower PBMC  
262 HIV DNA levels<sup>21</sup>. In addition, increased rates of G-to-A mutations were observed among  
263 HIV-seropositive individuals who spontaneously suppress HIV replication<sup>14, 22</sup>.

264 The present case is critical because it shows that some individuals are likely to  
265 inactivate integrated HIV after infection. As this woman's cells remained susceptible to HIV  
266 infection, this phenomenon appears to be linked to extrinsic factors. A possible explanation is  
267 that the microbiota of this woman hyperactivated APOBEC3 enzymes. Preliminary work has  
268 highlighted that bacterial components could stimulate the expression of APOBEC3G and  
269 enhance its activity on integrated HIV, which is certainly a path worthy of exploration<sup>23</sup>. The

270 modulation of the immune response by the digestive microbiota, in particular in the ileum  
271 where lymphocytes pass several times per day, is one of the keys that may open the way to  
272 new therapeutic strategies to fight HIV, as has been reported in the oncology field for which  
273 specific gut microbes are shown to drastically modulate responses to cancer  
274 immunotherapies.<sup>13</sup>.

275

276

### 277 **Contributors**

278 DR and PC designed the study. CD provided clinical data. PC, JD, OOG, MG and AL  
279 performed the molecular biology or bioinformatic analyses. PC, CD, CT, AL and DR  
280 analysed the study data. DR and PC wrote the manuscript. All authors revised or reviewed the  
281 manuscript critically and approved the final version.

282

### 283 **Funding**

284 This work was supported by the French Government under the “Investments for the Future”  
285 program managed by the National Agency for Research (ANR), Méditerranée-Infection 10-  
286 IAHU-03 and was also supported by Région Provence Alpes Côte d’Azur and European  
287 funding FEDER PRIMMI (Fonds Européen de Développement Régional - Plateformes de  
288 Recherche et d’Innovation Mutualisées Méditerranée Infection).

289

### 290 **Role of the funding source**

291 The funders of the study had no role in study design, data collection, data analysis, data  
292 interpretation, and writing of the report. All authors had full access to the data in the study and  
293 the corresponding author had final responsibility for the decision to submit for publication.

294

295 **Competing interests**

296 The authors declare no competing interests.

297

298 **Acknowledgments**

299 We thank Annick Abeille, Emilie Doudon, Emeline Baptiste, and Nathalie Duclos for their

300 technical assistance.

301

302

303

## REFERENCES

304

- 305 1. Feschotte, C., Gilbert, C. Endogenous viruses: insights into viral evolution and impact  
306 on host biology. *Nat. Rev. Genet.* **13**, 283-96 (2012).
- 307 2. Gifford, R., Tristem, M. The evolution, distribution and diversity of endogenous  
308 retroviruses. *Virus Genes* **26**, 291-315 (2003).
- 309 3. Katzourakis, A., Rambaut, A., Pybus, O. G. The evolutionary dynamics of endogenous  
310 retroviruses. *Trends Microbiol.* **13**, 463-8 (2005).
- 311 4. Tarlinton, R. E., Meers, J., Young, P. R. Retroviral invasion of the koala genome.  
312 *Nature* **442**, 79-81 (2006).
- 313 5. Barre-Sinoussi, F., Ross, A. L., Delfraissy, J. F. Past, present and future: 30 years of  
314 HIV research. *Nat. Rev. Microbiol.* **11**, 877-83 (2013).
- 315 6. Sengupta, S., Siliciano, R. F. Targeting the Latent Reservoir for HIV-1. *Immunity* **48**,  
316 872-95 (2018) .
- 317 7. Gupta, R. K., Abdul-Jawad, S., McCoy, L. E., et al. HIV-1 remission following  
318 CCR5Delta32/Delta32 haematopoietic stem-cell transplantation. *Nature* **568**, 244-248  
319 (2019).
- 320 8. Hutter, G., Nowak, D., Mossner, M., et al. Long-term control of HIV by CCR5  
321 Delta32/Delta32 stem-cell transplantation. *N. Engl. J. Med.* **360**, 692-8 (2009).
- 322 9. Harris, R. S., Liddament, M. T. Retroviral restriction by APOBEC proteins. *Nat. Rev.*  
323 *Immunol.* **4**, 868-77 (2004).
- 324 10. D'arc, M., Ayouba, A., Esteban, A., et al. Origin of the HIV-1 group O epidemic in  
325 western lowland gorillas. *Proc. Natl. Acad. Sci. U. S. A.* **112**, E1343-52 (2015).

- 326 11. Guihot, A., Marcelin, A. G., Massiani, M. A., et al. Drastic decrease of the HIV  
327 reservoir in a patient treated with nivolumab for lung cancer. *Ann. Oncol.* **29**, 517-518  
328 (2017).
- 329 12. Routy, B., Le Chatelier, E., Derosa, L., et al. Gut microbiome influences efficacy of PD-  
330 1-based immunotherapy against epithelial tumors. *Science* **359**, 91-7 (2018).
- 331 13. Zitvogel, L., Ma, Y., Raoult, D., Kroemer, G., Gajewski, T. F. The microbiome in  
332 cancer immunotherapy: Diagnostic tools and therapeutic strategies. *Science* **359**, 1366-  
333 70 (2018).
- 334 14. Colson, P., Ravaux, I., Tamalet, C., et al. HIV infection en route to endogenization: two  
335 cases. *Clin. Microbiol. Infect.* **20**, 1280-8 (2014).
- 336 15. Tamalet, C., Colson, P., Decroly, E., et al. Reevaluation of possible outcomes of  
337 infections with human immunodeficiency virus. *Clin. Microbiol. Infect.* **22**, 299-311  
338 (2016).
- 339 16. Carpenter, M. L., Buenrostro, J. D., Valdiosera, C., et al. Pulling out the 1%: whole-  
340 genome capture for the targeted enrichment of ancient DNA sequencing libraries. *Am. J.*  
341 *Hum. Genet.* **93**, 852-64 (2013).
- 342 17. Gaudin, M. and Denués, C. Application of human Whole-genome in-solution capture  
343 (WISC) for viral metagenomics. *Submitted* (2019).
- 344 18. Edgar, R. C. MUSCLE: multiple sequence alignment with high accuracy and high  
345 throughput. *Nucleic Acids Res.* **32**, 1792-7 (2004).
- 346 19. Tamalet, C., Masquelier, B., Ferchal, F., et al. Short-term evaluation of zidovudine-  
347 treated patients: decrease in plasma and cellular viraemia titres. *AIDS* **6**, 1403-4 (1992).
- 348 20. Shandilya, S. M., Bohn, M. F., Schiffer, C. A. A computational analysis of the structural  
349 determinants of APOBEC3's catalytic activity and vulnerability to HIV-1 Vif. *Virology*  
350 **471-473**, 105-16 (2014).

- 351 21. De Pasquale, M., Kourteva, Y., Allos, T., D'Aquila, R. T. Lower HIV provirus levels  
352 are associated with more APOBEC3G protein in blood resting memory CD4+ T  
353 lymphocytes of controllers *in vivo*. *PLoS One* **8**, e76002 (2013).
- 354 22. Eyzaguirre, L. M., Charurat, M., Redfield, R. R., et al. Elevated hypermutation levels in  
355 HIV-1 natural viral suppressors. *Virology* **443**, 306-12 (2013).
- 356 23. Wang, Z., Luo, Y., Shao, Q., et al. Heat-stable molecule derived from *Streptococcus*  
357 *cristatus* induces APOBEC3 expression and inhibits HIV-1 replication. *PLoS One* **9**,  
358 e106078 (2014).
- 359
- 360



## FIGURE LEGENDS

361

362

363 **Figure 1.** Phylogenetic analysis of HIV reverse transcriptase sequences obtained from the  
364 PBMC DNA of the woman and her contaminator.

365 The HIV-1 genome fragment analyzed here corresponds to a 671-nucleotide alignment  
366 generated from sequences of the reverse transcriptase-encoding gene and corresponding to  
367 nucleotides 2,596-3,266 of the HIV-1 genome GenBank accession no. K03455.1. Sequences  
368 obtained from the present cases are indicated by a bold white font and a black (CP3, woman)  
369 or a gray (CP5, contaminator) background. The 10 sequences with the highest BLAST score  
370 recovered from the NCBI GenBank nucleotide sequence database  
371 (<http://www.ncbi.nlm.nih.gov/nucleotide/>), labeled with BH Gbk (for best BLAST hit  
372 GenBank) and indicated by a green font, and from our local sequence database, labeled with  
373 BH IHU (for best BLAST hit IHU-Méditerranée Infection) and indicated by a blue font, were  
374 incorporated in the phylogeny reconstruction. Nucleotide alignments were performed using  
375 the MUSCLE software (<http://www.ebi.ac.uk/Tools/msa/muscle/>). The evolutionary history  
376 was inferred in the MEGA6 software (<http://www.megasoftware.net/>) using the neighbor-  
377 joining method and the Kimura 2-parameter method. The percentage of replicate trees in  
378 which the associated taxa clustered together in the bootstrap test (1,000 replicates) is shown  
379 next to the branches. The tree is drawn to scale, with branch lengths in the same units as those  
380 of the evolutionary distances used to infer the phylogenetic tree; the scale bars indicate the  
381 number of nucleotide substitutions per site. Bootstrap values >50% are labeled on the tree.  
382 NGS, next-generation sequencing.

383

384 **Figure 2.** Condensed view of the location and number of HIV DNA fragments recovered  
385 from the PBMCs of the woman using Sanger and next-generation sequencing (a) and

386 coverage of tryptophan stop codons in the HIV-1 genome by HIV sequences retrieved from  
387 the woman and contaminator PBMCs by Sanger or next-generation sequencing (b).

388 a: The number of nucleotide sequences per 100 nucleotide positions corresponds to the sum of  
389 sequences covering each nucleotide position per window of 100 nucleotides.

390 b: All 91 tryptophan stop codons covered by Sanger sequencing products obtained from the  
391 contaminator's PBMCs. Green indicates G nucleotides, red indicates A nucleotides, black  
392 indicates T or C nucleotides. Regarding sequences generated from the woman PBMCs, areas  
393 in dark and light gray indicate tryptophan codons not covered by any sequences obtained by  
394 both Sanger and next-generation sequencing or by one of these sequencing strategies,  
395 respectively.

396

397

## TABLES

398

399 **Table 1.** Proportions of positive HIV DNA test results for PCR systems used on DNA of peripheral blood mononuclear cells from HIV  
 400 seropositive cases and controls

401

| Patients                 | PCR testing      |                         | <i>P</i>                                                                              |
|--------------------------|------------------|-------------------------|---------------------------------------------------------------------------------------|
|                          | Number performed | Number of positives (%) |                                                                                       |
| Present case: woman      | 392              | 26 (7)                  | $\left. \begin{array}{l} <1e-5 \\ <1e-5 \\ <1e-5 \\ <1e-5 \end{array} \right\} 0.006$ |
| Contaminator             | 59               | 25 (42)                 |                                                                                       |
| Case No. 1 <sup>14</sup> | 218              | 44 (20)                 |                                                                                       |
| Case No. 2 <sup>14</sup> | 253              | 34 (13)                 |                                                                                       |

402

403 Cases No. 1 and No. 2 are two patients whose cases were previously reported <sup>14</sup> and from whom HIV could neither be detected by standard PCR assays  
 404 nor cultured, whereas very small amounts of HIV DNA could be laboriously retrieved from peripheral blood mononuclear cell DNA.

405

406

407

408 **Table 2.** G-to-A mutations detected in HIV DNA fragments obtained by Sanger or next-  
409 generation sequencing from woman PBMCs at G-harboring positions in the contaminator's  
410 HIV DNA

411

| HIV-1 gene                       | Number of positions harboring G-to-A mutations |    |
|----------------------------------|------------------------------------------------|----|
|                                  | Number                                         | %  |
| <i>gag</i>                       | 15                                             | 12 |
| <i>pol protease</i>              | 6                                              | 15 |
| <i>pol reverse transcriptase</i> | 20                                             | 9  |
| <i>pol RNase H</i>               | 6                                              | 29 |
| <i>pol integrase</i>             | 45                                             | 26 |
| <i>vif</i>                       | 30                                             | 23 |
| <i>vpr</i>                       | 13                                             | 17 |
| <i>tat</i>                       | 4                                              | 9  |
| <i>vpu</i>                       | 17                                             | 33 |
| <i>rev</i>                       | 4                                              | 11 |
| <i>env gp120</i>                 | 17                                             | 19 |
| <i>env gp41</i>                  | 1                                              | 3  |
| <i>nef</i>                       | 2                                              | 13 |

412

413

414 **Table 3.** Tryptophan-to-stop codon mutations detected in HIV DNA fragments obtained from  
 415 the woman and contaminator PBMCs by Sanger and next-generation sequencing

| HIV-1 gene                       | Number of sequences harboring mutations generating tryptophan codon-to-stop codon changes |                    |
|----------------------------------|-------------------------------------------------------------------------------------------|--------------------|
|                                  | Woman PBMCs<br>(Sanger/NGS)                                                               | Contaminator PBMCs |
| <i>gag</i>                       | -/2                                                                                       | 0                  |
| <i>pol protease</i>              | -/1                                                                                       | 0                  |
| <i>pol reverse transcriptase</i> | 0/2                                                                                       | 0                  |
| <i>pol integrase</i>             | 0/4                                                                                       | 0                  |
| <i>vif</i>                       | 1/5 (1 in common)                                                                         | 0                  |
| <i>vpr</i>                       | 1/2 (1 in common)                                                                         | 0                  |
| <i>tat</i>                       | 0/-                                                                                       | 0                  |
| <i>vpu</i>                       | 2/0                                                                                       | 0                  |
| <i>rev</i>                       | -/-                                                                                       | 0                  |
| <i>env gp120</i>                 | 5/0                                                                                       | 0                  |
| <i>env gp41</i>                  | -/-                                                                                       | 0                  |
| <i>nef</i>                       | -/-                                                                                       | 0                  |

416

417 -, no sequence; NGS, next-generation sequencing

418 **Table 4.** G-to-A mutations detected in HIV DNA fragments obtained from the woman PBMCs by next-generation sequencing in reference to  
 419 HIV DNA obtained from the contaminator PBMCs

| HIV-1 codons * | Numbers                 |                      |                    |                | P                                 |                        |                     |                                |
|----------------|-------------------------|----------------------|--------------------|----------------|-----------------------------------|------------------------|---------------------|--------------------------------|
|                | Total in the HIV genome | Covered by NGS reads | Not mutated (mean) | Mutated (mean) | Uncovered vs covered by NGS reads | Mutated vs not mutated | Lost vs not mutated | Mutated or lost vs not mutated |
| A              | 188                     | 59                   | 36                 | 23             | -                                 | -                      | -                   | -                              |
| C              | 55                      | 14                   | 12                 | 2              | -                                 | -                      | -                   | -                              |
| D              | 125                     | 35                   | 29                 | 6              | -                                 | -                      | 0.0388              | -                              |
| E              | 227                     | 75                   | 45                 | 30             | -                                 | -                      | -                   | -                              |
| F              | 86                      | 26                   | 19                 | 7              | -                                 | -                      | -                   | -                              |
| G              | 226                     | 80                   | 57                 | 23             | -                                 | -                      | -                   | -                              |
| H              | 72                      | 22                   | 16                 | 7              | -                                 | -                      | -                   | -                              |
| I              | 212                     | 77                   | 48                 | 29             | -                                 | -                      | -                   | -                              |
| K              | 211                     | 77                   | 56                 | 21             | -                                 | -                      | -                   | -                              |
| L              | 260                     | 74                   | 55                 | 20             | -                                 | -                      | -                   | -                              |
| M              | 62                      | 24                   | 15                 | 9              | -                                 | -                      | -                   | -                              |
| N              | 147                     | 42                   | 34                 | 8              | -                                 | -                      | -                   | -                              |
| P              | 176                     | 62                   | 41                 | 21             | -                                 | -                      | -                   | -                              |
| Q              | 180                     | 65                   | 45                 | 20             | -                                 | -                      | -                   | -                              |
| R              | 192                     | 52                   | 33                 | 19             | -                                 | -                      | -                   | -                              |
| S              | 168                     | 56                   | 39                 | 17             | -                                 | -                      | -                   | -                              |
| T              | 170                     | 46                   | 36                 | 10             | -                                 | -                      | -                   | -                              |
| V              | 184                     | 65                   | 40                 | 25             | -                                 | -                      | -                   | -                              |
| <b>W</b>       | <b>88</b>               | <b>27</b>            | <b>10</b>          | <b>17</b>      | -                                 | <b>0.0189</b>          | <b>0.0009</b>       | <b>0.0051</b>                  |
| Y              | 80                      | 33                   | 23                 | 10             | -                                 | -                      | -                   | -                              |

420  
 421  
 422

-, >0.05; \* Named according to the IUPAC amino acid notation (<https://iupac.org/>; W= tryptophan); NGS, next-generation sequencing

Fig. 1

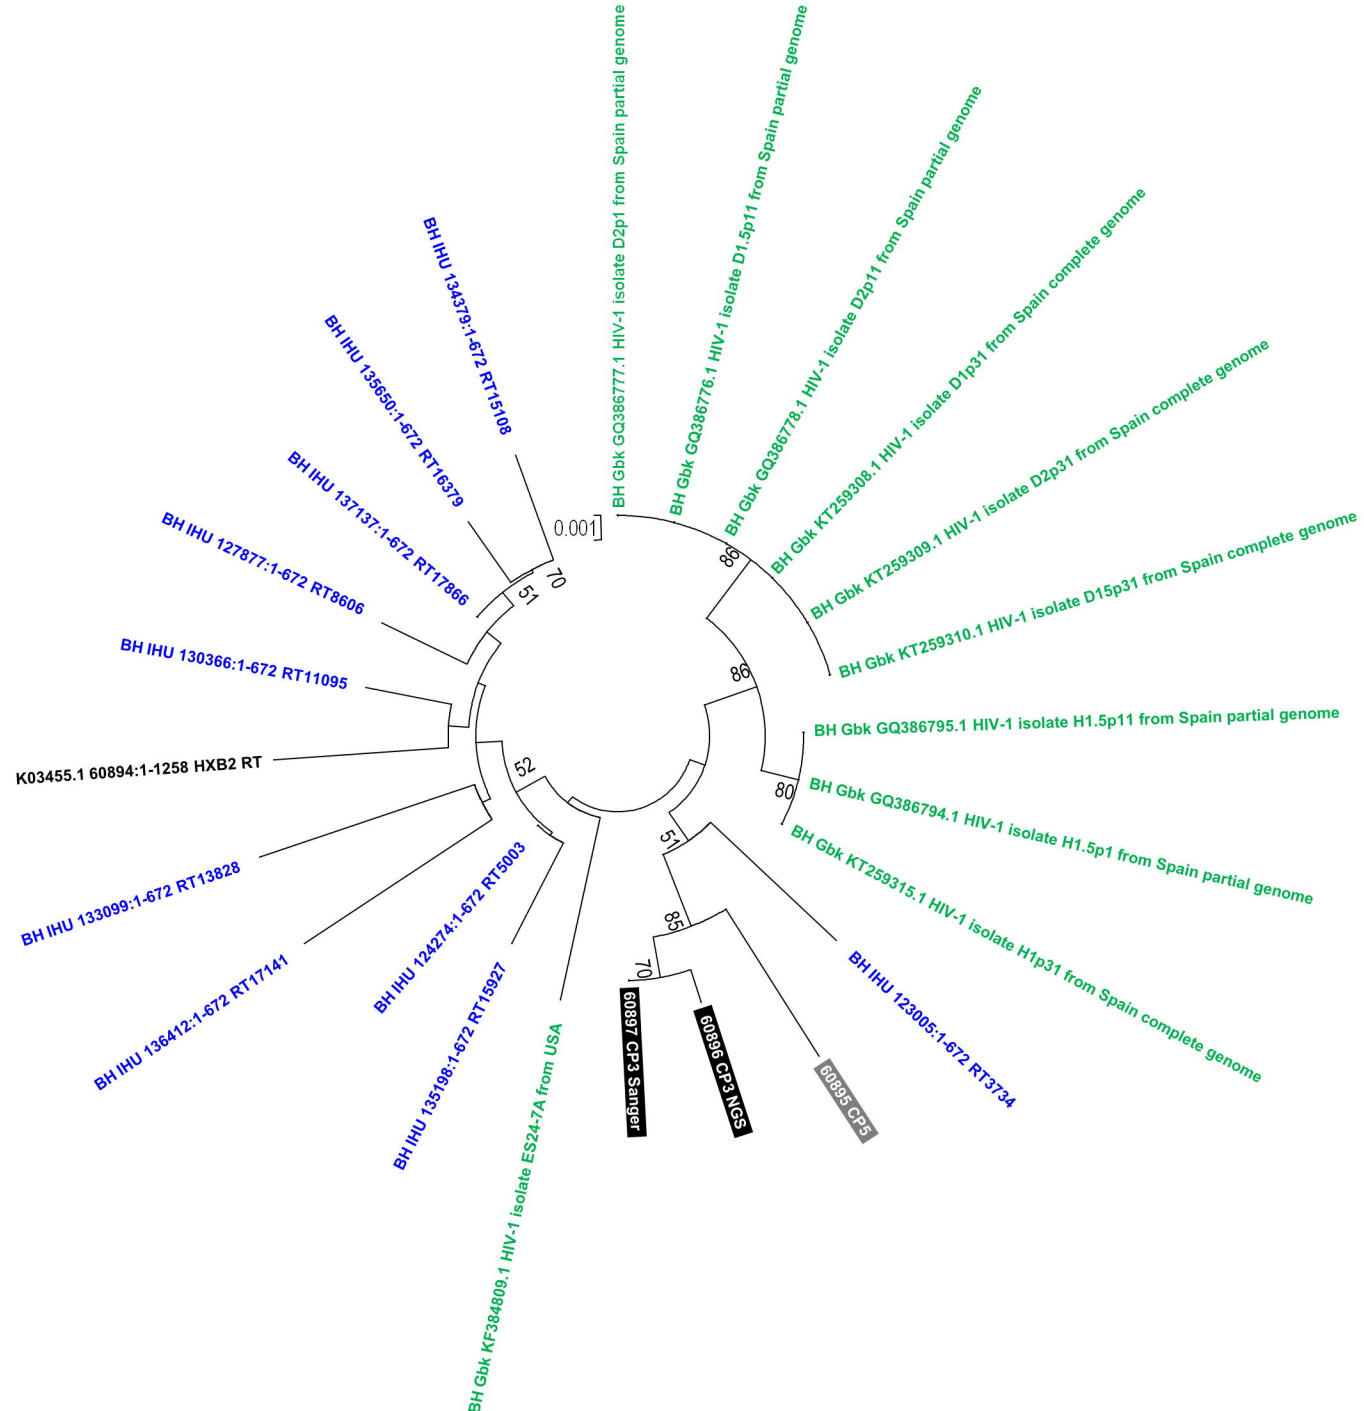

**Fig. 2** Map of HIV-1 genome K03455 and of its genes

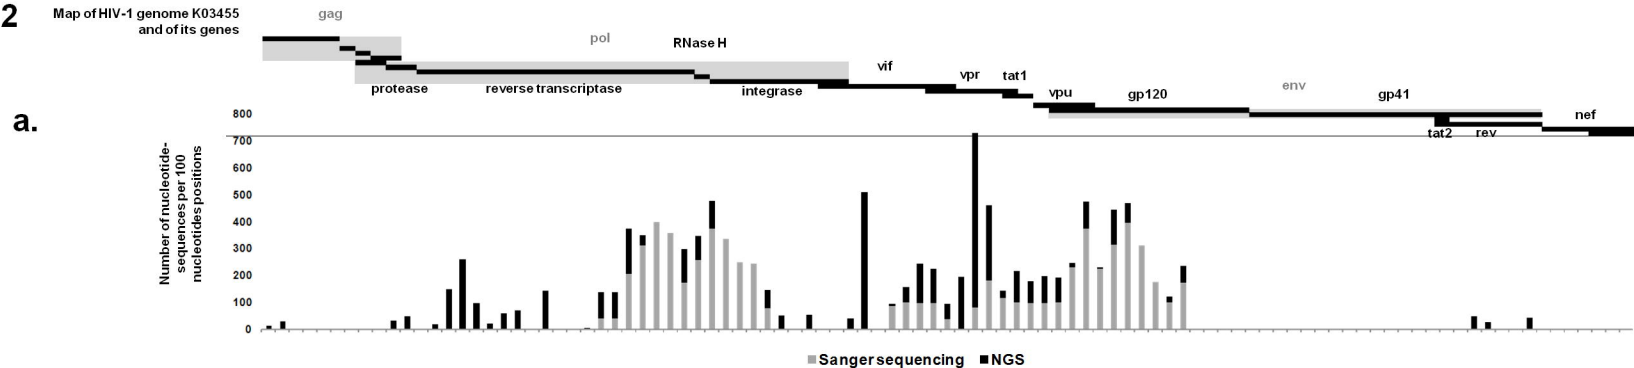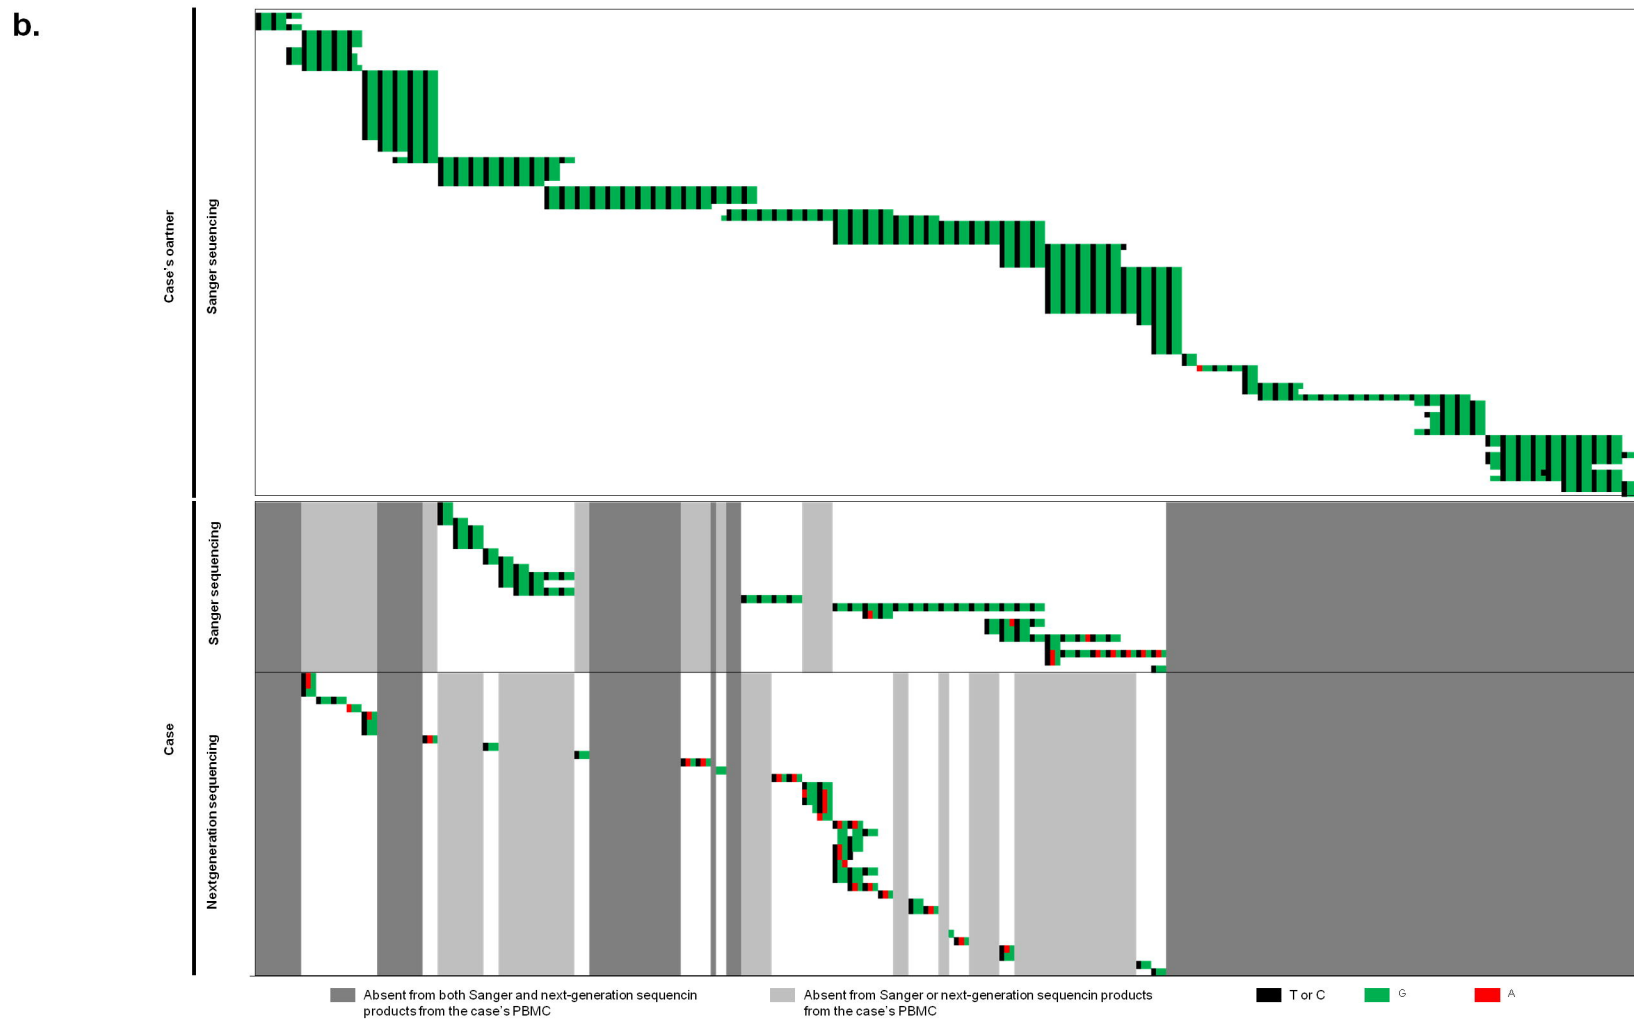

Source: http://biorxiv.org/content/10.1101/651752v1.full.pdf
